# Supplementary material
Source: Springer Nature journal article supplement (https://www.springermedizin.de/resource/supplementary/12879_2012_2547_MOESM9_ESM.pdf/9444842)

**A** Solomon Islands H1N1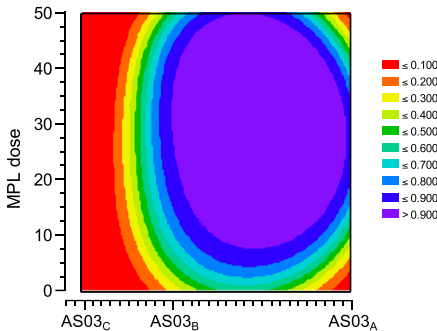**B** A/Wisconsin H3N2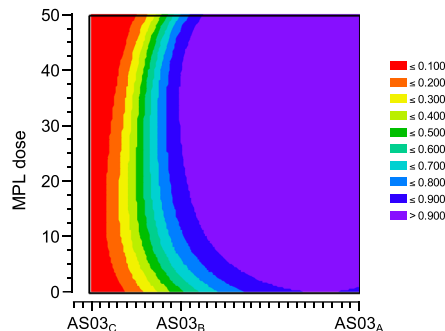**C** All three vaccine strains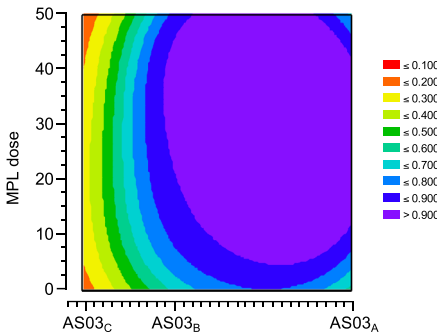

Supplement: MOESM9 [file 9444842]
